# Supplementary material for: Platelet size as a predictor for severity and mortality in COVID-19 patients: a systematic review and meta-analysis
Source: medRxiv preprint, doi:10.1101/2021.07.15.21260576, version 1 (2021-07-19)
Supplement: Supplementary material 5 [file 260576_file06.docx]

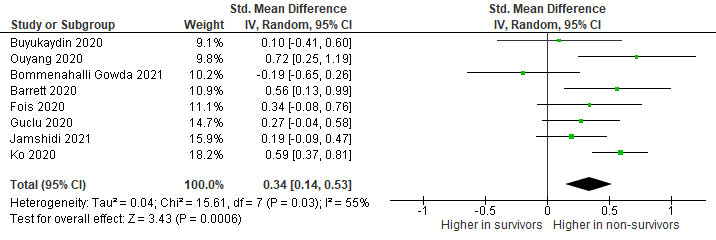


Figure 1: The summary of pooled mean differences of MPV on the observed day after admission between survivors and non-survivors.


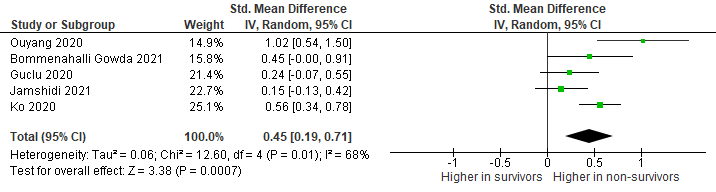


Figure 2: The summary of pooled mean differences of PDW on the observed day after admission between survivors and non-survivors


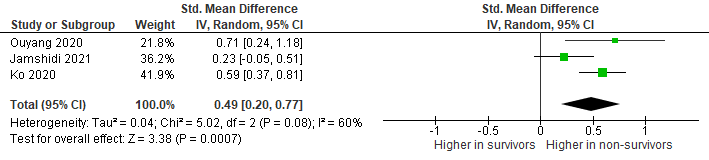


Figure 3: The summary of pooled mean differences of P-LCR on the observed day after admission between survivors and non-survivors
